# Supplementary material
Source: PubMed Central journal article supplement (PMC2874328)
Supplement: NIHMS191319-supplement-supplement_1.pdf [file NIHMS191319-supplement-supplement_1.pdf]

**Table S1.** Summary of TDT-type methods and their respective features

| Method/<br>Reference                                        | Incorporation of:  |                     |                        |                        |                       |                                   |                     |            |
|-------------------------------------------------------------|--------------------|---------------------|------------------------|------------------------|-----------------------|-----------------------------------|---------------------|------------|
|                                                             | Missing<br>parents | Multiple<br>alleles | Parental<br>phenotypes | Quantitative<br>traits | Extended<br>pedigrees | Different<br>family<br>structures | Multiple<br>markers | Covariates |
| Curtis (1997) <sup>S1</sup>                                 | *                  | *                   |                        |                        |                       |                                   |                     |            |
| S-TDT (Spielman<br>and Ewens, 1998) <sup>S2</sup>           | *                  | *                   |                        |                        |                       | *                                 |                     |            |
| DAT (Boehnke and<br>Langefeld, 1998) <sup>S3</sup>          | *                  | *                   |                        |                        |                       |                                   |                     |            |
| SDT (Horvath and<br>Laird, 1998) <sup>S4</sup>              | *                  | *                   |                        |                        |                       | *                                 |                     |            |
| NFS (Whittemore<br>and Tu, 2000) <sup>S5</sup>              | *                  | *                   |                        |                        |                       | *                                 | *                   | *          |
| TRANSMIT<br>(Clayton, 1999) <sup>S6</sup>                   | *                  | *                   |                        |                        |                       | *                                 | *                   |            |
| RC-TDT (Knapp,<br>1999) <sup>S7</sup>                       | *                  |                     |                        |                        |                       |                                   |                     |            |
| I-TDT (Sun et al.,<br>1999) <sup>S8</sup>                   | *                  | *                   |                        |                        |                       |                                   |                     |            |
| Martin et al.<br>(1997) <sup>S9</sup>                       | *                  | *                   |                        |                        |                       | *                                 |                     |            |
| George et al.<br>(1999) <sup>S10</sup>                      | *                  |                     |                        | *                      | *                     | *                                 |                     | *          |
| P-TDT (Abecasis<br>et al., 2000) <sup>S11</sup>             | *                  |                     |                        | *                      | *                     | *                                 |                     | *          |
| Bickeboller and<br>Clerget-Darpoux<br>(1995) <sup>S12</sup> |                    | *                   |                        |                        |                       |                                   |                     |            |
| Spielman and<br>Ewens (1996) <sup>S13</sup>                 |                    | *                   |                        |                        |                       |                                   |                     |            |
| Purcell et al.<br>(2005) <sup>S14</sup>                     |                    |                     | *                      | *                      |                       |                                   |                     | *          |
| TDT(max) (Morris,<br>1997) <sup>S15</sup>                   |                    | *                   |                        |                        |                       |                                   |                     |            |
| Lazzeroni and<br>Lange (1998) <sup>S16</sup>                |                    | *                   |                        |                        |                       |                                   | *                   |            |
| Monks and Kaplan<br>(2000) <sup>S17</sup>                   |                    | *                   |                        | *                      |                       | *                                 | *                   |            |
| Xiong et al.<br>(1998) <sup>S18</sup>                       |                    | *                   |                        | *                      |                       |                                   |                     |            |

Continued

Table S1. Continued

| Method/<br>Reference                                   | Incorporation of:  |                     |                        |                        |                       |                                   |                     |            |
|--------------------------------------------------------|--------------------|---------------------|------------------------|------------------------|-----------------------|-----------------------------------|---------------------|------------|
|                                                        | Missing<br>parents | Multiple<br>alleles | Parental<br>phenotypes | Quantitative<br>traits | Extended<br>pedigrees | Different<br>family<br>structures | Multiple<br>markers | Covariates |
| Fan and Jung<br>(2002) <sup>S19</sup>                  |                    | *                   |                        | *                      |                       | *                                 |                     | *          |
| TDT(Q1) –<br>TDT(Q5) (Allison,<br>1997) <sup>S20</sup> |                    |                     |                        | *                      |                       |                                   |                     | *          |
| Rabinowitz<br>(1997) <sup>S21</sup>                    |                    | *                   |                        | *                      |                       |                                   |                     | *          |
| Allison <i>et al.</i><br>(1999) <sup>S22</sup>         | *                  | *                   |                        | *                      |                       |                                   |                     |            |
| Sun <i>et al.</i> (2000) <sup>S23</sup>                | *                  |                     |                        | *                      |                       | *                                 |                     | *          |
| Schaid and<br>Rowlands (2000) <sup>S24</sup>           |                    |                     |                        | *                      |                       | *                                 |                     | *          |
| Waldman <i>et al.</i><br>(1999) <sup>S25</sup>         |                    |                     |                        | *                      |                       |                                   |                     | *          |
| Sinsheimer <i>et al.</i><br>(2000) <sup>S26</sup>      |                    | *                   |                        | *                      | *                     |                                   | *                   | *          |
| Kistner and<br>Weinberg (2004) <sup>S27</sup>          | *                  | *                   |                        | *                      |                       |                                   |                     |            |
| QTD (Abecasis<br><i>et al.</i> , 2000) <sup>S28</sup>  | *                  |                     |                        | *                      |                       | *                                 |                     | *          |
| Zhu and Elston<br>(2001) <sup>S29</sup>                |                    |                     |                        | *                      | *                     | *                                 |                     | *          |
| PDT (Martin,<br>2000) <sup>S30</sup>                   |                    |                     |                        |                        | *                     | *                                 |                     |            |
| Goring and<br>Terwilliger<br>(2000) <sup>S31</sup>     |                    |                     |                        |                        | *                     | *                                 |                     |            |
| Clayton and Jones<br>(1999) <sup>S32</sup>             |                    |                     |                        | *                      |                       |                                   | *                   |            |
| ETDT (Sham and<br>Curtis, 1995) <sup>S33</sup>         |                    | *                   |                        |                        |                       |                                   |                     |            |
| TDT-EX (Cleves<br><i>et al.</i> , 1997) <sup>S34</sup> | *                  | *                   |                        |                        |                       |                                   |                     |            |
| Fulker (1999) <sup>S35</sup>                           | *                  |                     |                        | *                      |                       |                                   |                     | *          |
| Fan <i>et al.</i> (2002) <sup>S36</sup>                |                    | *                   |                        | *                      |                       |                                   |                     | *          |

## Table S1 References

- S1. Curtis, D. (1997), 'Use of siblings as controls in case-control association studies', *Ann. Hum. Genet.* Vol. 61, No. 4, July, pp. 319–333.
- S2. Spielman, R.S. and Ewens, W.J. (1998), 'A sibship test for linkage in the presence of association: The sib transmission/disequilibrium test', *Am. J. Hum. Genet.* Vol. 62, No. 2, February, pp. 450–458.
- S3. Boehnke, M. and Langefeld, C.D. (1998), 'Genetic association mapping based on discordant sib pairs: The discordant-alleles test', *Am. J. Hum. Genet.* Vol. 62, No. 4, April, pp. 950–961.
- S4. Horvath, S. and Laird, N.M. (1998), 'A discordant-sibship test for disequilibrium and linkage: No need for parental data', *Am. J. Hum. Genet.* Vol. 63, No. 6, December, pp. 1886–1897.
- S5. Whittemore, A.S. and Tu, I.P. (2000), 'Detection of disease genes by use of family data. I. Likelihood-based theory', *Am. J. Hum. Genet.* Vol. 66, No. 4, April, pp. 1328–1340.
- S6. Clayton, D. (1999), 'A generalization of the transmission/disequilibrium test for uncertain-haplotype transmission', *Am. J. Hum. Genet.* Vol. 65, No. 4, October, pp. 1170–1177.
- S7. Knapp, M. (1999), 'The transmission/disequilibrium test and parental-genotype reconstruction: The reconstruction-combined transmission/disequilibrium test', *Am. J. Hum. Genet.* Vol. 64, No. 3, March, pp. 861–870.
- S8. Sun, F., Flanders, W., Yang, Q. and Khoury, M. (1999), 'Transmission disequilibrium test (TDT) when only one parent is available: The 1-TDT', *Am. J. Epidemiol.* Vol. 150, pp. 97–104.
- S9. Martin, E.R., Kaplan, N.L. and Weir, B.S. (1997), 'Tests for linkage and association in nuclear families', *Am. J. Hum. Genet.* Vol. 61, No. 2, August, pp. 439–448.
- S10. George, V., Tiwari, H.K., Zhu, X. and Elston, R.C. (1999), 'A test of transmission/disequilibrium for quantitative traits in pedigree data, by multiple regression', *Am. J. Hum. Genet.* Vol. 65, No. 1, July, pp. 236–245.
- S11. Abecasis, G.R., Cookson, W.O. and Cardon, L.R. (2000), 'Pedigree tests of transmission disequilibrium', *Eur. J. Hum. Genet.* Vol. 8, No. 7, pp. 545–551.
- S12. Bickeboller, H. and Clerget-Darpoux, F. (1995), 'Statistical properties of the allelic and genotypic transmission/disequilibrium test for multiallelic markers', *Genet. Epidemiol.* Vol. 12, No. 6, pp. 865–870.
- S13. Spielman, R.S. and Ewens, W.J. (1996), 'The TDT and other family-based tests for linkage disequilibrium and association', *Am. J. Hum. Genet.* Vol. 59, No. 5, November, pp. 983–989.
- S14. Purcell, S., Sham, P.C. and Daly, M.J. (2005), 'Parental phenotypes in family-based association analysis', *Am. J. Hum. Genet.* Vol. 76, No. 2, pp. 249–259.
- S15. Morris, A.P., Curnow, R.N. and Whittaker, J.C. (1997), 'Randomization tests of disease-marker associations', *Ann. Hum. Genet.* Vol. 61, No. 1, January, pp. 49–60.
- S16. Lazzeroni, L.C. and Lange, K. (1998), 'A conditional inference framework for extending the transmission/disequilibrium test', *Hum. Hered.* Vol. 48, No. 2, March, pp. 67–81.
- S17. Monks, S.A. and Kaplan, N.L. (2000), 'Removing the sampling restrictions from family-based tests of association for a quantitative-trait locus', *Am. J. Hum. Genet.* Vol. 66, No. 2, February, pp. 576–592.
- S18. Xiong, M.M., Krushkal, J. and Boerwinkle, E. (1998), 'TDT statistics for mapping quantitative trait loci', *Ann. Hum. Genet.* Vol. 62, No. 5, September, pp. 431–452.
- S19. Fan, R. and Jung, J. (2002), 'Association studies of QTL for multi-allele markers by mixed models', *Hum. Hered.* Vol. 54, No. 3, pp. 132–150.
- S20. Allison, D.B. (1997), 'Transmission-disequilibrium tests for quantitative traits', *Am. J. Hum. Genet.* Vol. 60, No. 3, March, pp. 676–690.
- S21. Rabinowitz, D. (1997), 'A transmission disequilibrium test for quantitative trait loci', *Hum. Hered.* Vol. 47, No. 6, November, pp. 342–350.
- S22. Allison, D.B., Neale, M.C., Zannolli, R., Schork, N.J. et al. (1999), 'The robustness of the likelihood-ratio test in a variance-component quantitative-trait loci-mapping procedure', *Am. J. Hum. Genet.* Vol. 65, No. 2, August, pp. 531–544.
- S23. Sun, F., Flanders, W., Yang, Q. and Zhao, H. (2000), 'Transmission/disequilibrium tests for quantitative traits', *Ann. Hum. Genet.* Vol. 64, pp. 555–565.
- S24. Schaid, D.J. and Rowland, C.M. (2000), 'Robust transmission regression models for linkage and association', *Genet. Epidemiol.* Vol. 19, Suppl. 1, pp. S78–S84.
- S25. Waldman, I.D., Robinson, B.F. and Rowe, D.C. (1999), 'A logistic regression based extension of the TDT for continuous and categorical traits', *Ann. Hum. Genet.* Vol. 63, No. 4, July, pp. 329–340.
- S26. Sinsheimer, J.S., Blangero, J. and Lange, K. (2000), 'Gamete-competition models', *Am. J. Hum. Genet.* Vol. 66, No. 3, March, pp. 1168–1172.
- S27. Kistner, E.O. and Weinberg, C.R. (2004), 'Method for using complete and incomplete trios to identify genes related to a quantitative trait', *Genet. Epidemiol.* Vol. 27, No. 1, July, pp. 33–42.
- S28. Abecasis, G.R., Cardon, L.R. and Cookson, W.O. (2000), 'A general test of association for quantitative traits in nuclear families', *Am. J. Hum. Genet.* Vol. 66, pp. 279–292.
- S29. Zhu, X. and Elston, R.C. (2001), 'Transmission/disequilibrium tests for quantitative traits', *Genet. Epidemiol.* Vol. 20, No. 1, January, pp. 57–74.
- S30. Martin, E.R., Monks, S.A., Warren, L.L. and Kaplan, N.L. (2000), 'A test for linkage and association in general pedigrees: The pedigree disequilibrium test', *Am. J. Hum. Genet.* Vol. 67, No. 1, pp. 146–154.
- S31. Goring, H.H. and Terwilliger, J.D. (2000), 'Linkage analysis in the presence of errors IV: Joint pseudomarker analysis of linkage and/or linkage disequilibrium on a mixture of pedigrees and singletons when the mode of inheritance cannot be accurately specified', *Am. J. Hum. Genet.* Vol. 66, No. 14, pp. 1310–1327.
- S32. Clayton, D. and Jones, H. (1999), 'Transmission/disequilibrium tests for extended marker haplotypes', *Am. J. Hum. Genet.* Vol. 65, No. 4, October, pp. 1161–1169.
- S33. Sham, P.C. and Curtis, D. (1995), 'An extended transmission/disequilibrium test (TDT) for multiallele marker loci', *Am. Hum. Genet.* Vol. 59, Nos. 53/323, p. 336.
- S34. Cleves, M.A., Olson, J.M. and Jacobs, K.B. (1997), 'Exact transmission-disequilibrium tests with multiallelic markers', *Genet. Epidemiol.* Vol. 14, No. 4, pp. 337–347.
- S35. Fulker, D.W., Sham, P.C. and Hewitt, J.K. (1999), 'Combined linkage and association sib-pair analysis for quantitative traits', *Am. J. Hum. Genet.* Vol. 64, pp. 259–267.
- S36. Fan, R., Floros, J. and Xiong, M. (2002), 'Models and tests of linkage and association studies of quantitative trait locus for multi-allele marker loci', *Hum. Hered.* Vol. 53, No. 3, pp. 130–145.
